# Supplementary material for: Cd2+ Sorption Alterations in Ultisol Soils Triggered by Different Engineered Nanoparticles and Incubation Times
Source: MDPI journal article supplement (doi:10.3390/nano13243115), 2023-12-11
Supplement: s1 [file s1]

## Supporting Information

# **Cd<sup>2+</sup> Sorption Alterations in Ultisol Soils Triggered by Different Engineered Nanoparticles and Incubation Times**

**Karen Manquián-Cerda <sup>1,\*</sup>, Raúl Calderón <sup>2</sup>, Mauricio Molina-Roco <sup>3</sup>, Tamara Maldonado <sup>4</sup> and Nicolás Arancibia-Miranda <sup>1,\*</sup>**

<sup>1</sup> Facultad de Química y Biología, Universidad de Santiago de Chile, Av. B. O'Higgins, 3363, Santiago 9170124, Chile

<sup>2</sup> Centro de Investigación en Recursos Naturales y Sustentabilidad, Universidad Bernardo O'Higgins, Fabrica 1990, Segundo Piso, Santiago 8370993, Chile; raul.calderon@ubo.cl

<sup>3</sup> Departamento de Acuicultura y Recursos Agroalimentarios, Campus Osorno-Chuyaca, Universidad de los Lagos, Osorno 5290000, Chile; mauricio.molina1@ulagos.cl

<sup>4</sup> Instituto de Química, Facultad de Ciencias, Pontificia Universidad Católica de Valparaíso, Av. Universidad 330, Placilla, Valparaíso 2373223, Chile; tamara.maldonado@pucv.cl

\* Correspondence: karen.manquian@usach.cl (K.M.-C.); nicolas.arancibia@usach.cl (N.A.-M.)

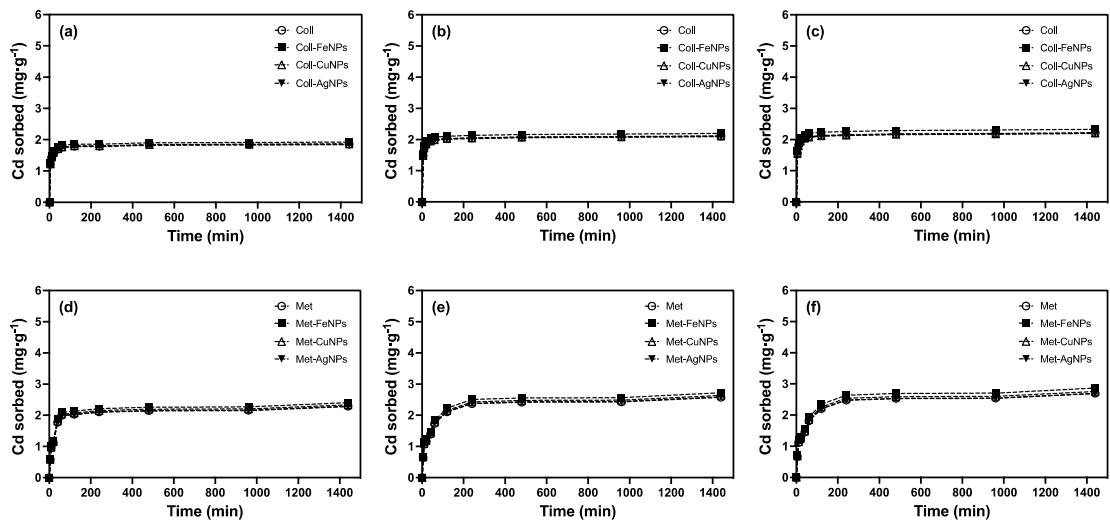

**Figure S1.** Effect of nanoparticle type and aging time on Cd sorption kinetics in Ultisols soils at a dose of  $20 \text{ mg ENPs} \cdot \text{kg}^{-1}$ . Figure S1a and S1d Collipulli and Metrenco 1 month, Figure S1b and S1e Collipulli and Metrenco 3 months, and S1c and S1f Collipulli and Metrenco 6 months.

**Table S1:** Kinetic parameters predicted from the pseudo-second order for control soils and soils treated with 20 mg ENPs·kg<sup>-1</sup>.

| Collipulli                                     |             |             |             |             |             |             |             |             |             |             |             |             |
|------------------------------------------------|-------------|-------------|-------------|-------------|-------------|-------------|-------------|-------------|-------------|-------------|-------------|-------------|
|                                                | 1 Month     |             |             |             | 3 Month     |             |             |             | 6 Month     |             |             |             |
| Treatment                                      | Control     | AgNPs       | CuNPs       | FeNPs       | Control     | AgNPs       | CuNPs       | FeNPs       | Control     | AgNPs       | CuNPs       | FeNPs       |
| $q_{exp} (mg \cdot g^{-1})$                    | 1,73 ± 0,02 | 1,79 ± 0,01 | 1,82 ± 0,01 | 1,85 ± 0,02 | 1,81 ± 0,01 | 1,89 ± 0,01 | 1,91 ± 0,03 | 1,93± 0,02  | 1,85 ± 0,01 | 1,90 ± 0,01 | 1,93 ± 0,01 | 1,99 ± 0,01 |
| $q_{exp} (%)$                                  | 43,3 ± 2,1  | 44, 8 ± 1,9 | 45,2 ± 3,0  | 46,3 ± 2,1  | 45,1 ± 2,3  | 47,3 ± 3,1  | 47,8 ± 3,1  | 48,3 ± 1,3  | 46,3 ± 2,5  | 47,5 ± 3,3  | 48,3 ± 2,2  | 49,7 ± 1,1  |
| Parameters                                     | 1 Month     |             |             |             | 3 Month     |             |             |             | 6 Month     |             |             |             |
| $q_e (mg \cdot g^{-1})$                        | 1,84 ± 0,01 | 1,82 ± 0,01 | 1,84 ± 0,01 | 1,90 ± 0,01 | 1,92 ± 0,01 | 1,96 ± 0,02 | 2,07 ± 0,01 | 2,16 ± 0,01 | 2,18 ± 0,01 | 2,16 ± 0,01 | 2,17 ± 0,01 | 2,29 ± 0,01 |
| $k_2 (x10^{-4}g \cdot mg^{-1} \cdot min^{-1})$ | 0,20 ± 0,01 | 0,20 ± 0,01 | 0,20 ± 0,01 | 0,20 ± 0,01 | 0,23 ± 0,01 | 0,24 ± 0,01 | 0,23 ± 0,01 | 0,22 ± 0,01 | 0,22 ± 0,01 | 0,22 ± 0,01 | 0,22 ± 0,01 | 0,21 ± 0,01 |
| $h (mg \cdot g^{-1} \cdot min^{-1})$           | 0,68 ± 0,00 | 0,68 ± 0,00 | 0,68 ± 0,00 | 0,71 ± 0,00 | 1,01 ± 0,00 | 1,00 ± 0,00 | 1,00 ± 0,00 | 1,05 ± 0,00 | 1,06 ± 0,00 | 1,04 ± 0,00 | 1,05 ± 0,00 | 1,11 ± 0,00 |
| $r^2$                                          | 0,989       | 0,975       | 0,987       | 0,984       | 0,977       | 0,971       | 0,989       | 0,974       | 0,961       | 0,957       | 0,969       | 0,959       |
| $\chi^2$                                       |             |             |             |             |             |             |             |             |             |             |             |             |
| Metrenco                                       |             |             |             |             |             |             |             |             |             |             |             |             |
| Treatment                                      | Control     | AgNPs       | CuNPs       | FeNPs       | Control     | AgNPs       | CuNPs       | FeNPs       | Control     | AgNPs       | CuNPs       | FeNPs       |
| $q_{exp} (mg \cdot g^{-1})$                    | 2,11 ± 0,21 | 2,17 ± 0,41 | 2,23 ± 0,19 | 2,27 ± 0,09 | 2,17 ± 0,11 | 2,21 ± 0,26 | 2,26 ± 0,39 | 2,29 ± 0,3  | 2,23 ± 0,21 | 2,25 ± 0,19 | 2,29 ± 0,11 | 2,31 ± 0,13 |
| $q_{exp} (%)$                                  | 52,8 ± 3,1  | 54,3 ± 3,1  | 55,5 ± 2,7  | 57,1± 0,1   | 54,3 ± 1,2  | 55,3 ± 2,5  | 56,5 ± 1,5  | 57,5± 0,5   | 55,8 ± 0,3  | 56,3 ± 1,2  | 57,3 ± 1,1  | 58,1 ± 2,5  |
| Parameters                                     | 1 Month     |             |             |             | 3 Month     |             |             |             | 6 Month     |             |             |             |
| $q_e (mg \cdot g^{-1})$                        | 2,27 ± 0,05 | 2,26 ± 0,05 | 0,03 ± 0,00 | 0,03 ± 0,00 | 2,51 ± 0,08 | 2,52 ± 0,08 | 2,56 ± 0,08 | 2,65 ± 0,08 | 2,63 ± 0,09 | 2,69 ± 0,09 | 2,69 ± 0,09 | 2,79 ± 0,09 |
| $k_2 (x10^{-4}g \cdot mg^{-1} \cdot min^{-1})$ | 0,03 ± 0,00 | 0,03 ± 0,00 | 0,03 ± 0,00 | 0,03 ± 0,00 | 0,02 ± 0,00 | 0,02 ± 0,00 | 0,02 ± 0,00 | 0,02 ± 0,00 | 0,02 ± 0,00 | 0,02 ± 0,00 | 0,02 ± 0,00 | 0,02 ± 0,00 |
| $h (mg \cdot g^{-1} \cdot min^{-1})$           | 0,16 ± 0,00 | 0,16 ± 0,00 | 0,16 ± 0,00 | 0,17 ± 0,00 | 0,12 ± 0,00 | 0,12 ± 0,00 | 0,12 ± 0,00 | 0,12 ± 0,00 | 0,12 ± 0,00 | 0,12 ± 0,00 | 0,13 ± 0,00 | 0,13 ± 0,00 |
| $r^2$                                          | 0,983       | 0,971       | 0,948       | 0,972       | 0,941       | 0,948       | 0,962       | 0,969       | 0,943       | 0,967       | 0,981       | 0,982       |
| $\chi^2$                                       | 0,088       | 0,121       | 0,077       | 0,023       | 0,015       | 0,101       | 0,073       | 0,099       | 0,015       | 0,066       | 0,179       | 0,105       |

**Table S2.** Kinetic parameters forecasted from the linear evaluation of the intraparticle diffusion kinetic model for the soils studied.

| Collipulli                                    |             |             |             |             |             |             |             |             |             |             |             |             |
|-----------------------------------------------|-------------|-------------|-------------|-------------|-------------|-------------|-------------|-------------|-------------|-------------|-------------|-------------|
| Treatment                                     | Control     | AgNPs       | CuNPs       | FeNPs       | Control     | AgNPs       | CuNPs       | FeNPs       | Control     | AgNPs       | CuNPs       | FeNPs       |
| Intraparticle diffusion                       | 1 Month     |             |             |             | 3 Month     |             |             |             | 6 Month     |             |             |             |
| $q_{e-1} (mg \cdot g^{-1})$                   | 1,54 ± 0,09 | 1,59 ± 0,09 | 1,61 ± 0,13 | 1,63 ± 0,23 | 1,56 ± 0,09 | 1,57 ± 0,12 | 1,61 ± 0,10 | 1,64 ± 0,00 | 1,56 ± 0,11 | 1,59 ± 0,00 | 1,62 ± 0,09 | 1,65 ± 0,01 |
| $k_{int-1} (mg \cdot g^{-1} \cdot min^{1/2})$ | 0,16 ± 0,02 | 0,17 ± 0,01 | 0,18 ± 0,02 | 0,19 ± 0,03 | 0,16 ± 0,01 | 0,18 ± 0,01 | 0,21 ± 0,03 | 0,23 ± 0,05 | 0,17 ± 0,01 | 0,18 ± 0,01 | 0,21 ± 0,00 | 0,23 ± 0,02 |
| $C_1 (mg \cdot g^{-1})$                       | 0,85 ± 0,01 | 0,83 ± 0,00 | 0,82 ± 0,00 | 0,79 ± 0,00 | 0,83 ± 0,03 | 0,86 ± 0,02 | 0,88± 0,09  | 0,90 ± 0,03 | 0,83 ± 0,00 | 0,82 ± 0,00 | 0,84 ± 0,01 | 0,86 ± 0,02 |
| $r^2$                                         | 0,978       | 0,959       | 0,991       | 0,992       | 0,951       | 0,983       | 0,934       | 0,972       | 0,945       | 0,939       | 0,965       | 0,992       |
| Metrenco                                      |             |             |             |             |             |             |             |             |             |             |             |             |
| Intraparticle diffusion                       | 1 Month     |             |             |             | 3 Month     |             |             |             | 6 Month     |             |             |             |
| $q_{e-1} (mg \cdot g^{-1})$                   | 1,16 ± 0,09 | 1,19 ± 0,07 | 1,21 ± 0,04 | 1,23 ± 0,32 | 1,14 ± 0,03 | 1,20 ± 0,08 | 1,22 ± 0,03 | 1,25 ± 0,09 | 1,16 ± 0,08 | 1,21 ± 0,02 | 1,25 ± 0,03 | 1,28 ± 0,01 |
| $k_{int-1} (mg \cdot g^{-1} \cdot min^{1/2})$ | 0,23 ± 0,01 | 0,23 ± 0,00 | 0,26 ± 0,01 | 0,28 ± 0,03 | 0,22 ± 0,01 | 0,25 ± 0,01 | 0,27 ± 0,01 | 0,30 ± 0,03 | 0,24 ± 0,02 | 0,25 ± 0,01 | 0,28 ± 0,01 | 0,31 ± 0,03 |
| $C_1 (mg \cdot g^{-1})$                       | 0,09 ± 0,00 | 0,12 ± 0,01 | 0,14 ± 0,00 | 0,17 ± 0,01 | 0,23 ± 0,01 | 0,24 ± 0,03 | 0,28 ± 0,01 | 0,30 ± 0,07 | 0,24 ± 0,00 | 0,21 ± 0,04 | 0,25 ± 0,01 | 0,32 ± 0,03 |
| $r^2$                                         | 0,955       | 0,899       | 0,965       | 0,942       | 0,981       | 0,951       | 0,956       | 0,972       | 0,919       | 0,995       | 0,987       | 0,996       |
